# Supplementary material for: Using an Overlapping Time Interval Strategy to Study Diagnostic Instability in Mild Cognitive Impairment Subtypes
Source: Brain Sci. 2019 Sep 19;9(9):242. doi: 10.3390/brainsci9090242 (PMC6770378; doi:10.3390/brainsci9090242)
Supplement: Supplementary file 1 [file brainsci-09-00242-s001.xlsx]

## Sheet: Interval 1
		Baseline P(A)									Follow-up P(B)
					mda-MCI	na-MCI	sda-MCI	Control	Dementia
		mda-MCI	0.11		0.0077	0.0055	0.0121	0.0825	0.0022	0.11	mda-MCI	0.07
		na-MCI	0.06		0.0042	0.003	0.0066	0.045	0.0012	0.06	na-MCI	0.05
		sda-MCI	0.18		0.0126	0.009	0.0198	0.135	0.0036	0.18	sda-MCI	0.11
		Control	0.65		0.0455	0.0325	0.0715	0.4875	0.013	0.65	Control	0.75
		Dementia	0		0	0	0	0	0	0	Dementia	0.02
		TOTAL	1								TOTAL	1
					0.07	0.05	0.11	0.75	0.02	1
								Odds
	Follow-up B	Baseline A	P(B)	P(A)	P(B/A)	P(B/A)*P(A)	P(A/B)	mda-MCI	na-MCI	sda-MCI
	mda-MCI	mda-MCI	0.07	0.11	0.0077	0.000847	0.0257119
		na-MCI		0.06	0.0042	0.000252	0.00764981	3.36111
		sda-MCI		0.18	0.0126	0.002268	0.0688483	2.67769	9
		Control		0.65	0.0455	0.029575	0.89779	34.9174	117.361	13.0401
		Dementia		0	0	0	0
					Summation	0.032942	1
	Follow-up	Baseline	VALUE
	na-MCI	mda-MCI	0.05	0.11	0.0055	0.000605	0.0257119
		na-MCI		0.06	0.003	0.00018	0.00764981	3.36111
		sda-MCI		0.18	0.009	0.00162	0.0766864	2.98253	10.0246
		Control		0.65	0.0325	0.021125	0.89779	34.9174	117.361	11.7073
		Dementia		0	0	0	0
					Summation	0.02353	1.00784
	Follow-up	Baseline	VALUE
	sda-MCI	mda-MCI	0.11	0.11	0.0121	0.001331	0.0257119
		na-MCI		0.06	0.0066	0.000396	0.00764981	3.36111
		sda-MCI		0.18	0.0198	0.003564	0.0688483	2.67769	9
		Control		0.65	0.0715	0.046475	0.89779	34.9174	117.361	13.0401
		Dementia		0	0	0	0
					Summation	0.051766	1
	Follow-up	Baseline	VALUE
	Control	mda-MCI	0.75	0.11	0.0825	0.009075	0.0257119
		na-MCI		0.06	0.045	0.0027	0.00764981	3.36111
		sda-MCI		0.18	0.135	0.0243	0.0688483	2.67769	9
		Control		0.65	0.4875	0.316875	0.89779	34.9174	117.361	13.0401
		Dementia		0	0	0	0
					Summation	0.35295	1
	Follow-up	Baseline	VALUE
	Dementia	mda-MCI	0.02	0.11	0.0022	0.000242	0.0257119
		na-MCI		0.06	0.0012	7.2e-05	0.00764981	3.36111
		sda-MCI		0.18	0.0036	0.000648	0.0688483	2.67769	9
		Control		0.65	0.013	0.00845	0.89779	34.9174	117.361	13.0401
		Dementia		0	0	0	0
					Summation	0.009412	1

## Sheet: Interval 2
		Baseline P(A)									Follow-up P(B)
					mda-MCI	na-MCI	sda-MCI	Control	Dementia
		mda-MCI	0.08		0.004	0.0072	0.0088	0.0584	0.0016	0.08	mda-MCI	0.05
		na-MCI	0.08		0.004	0.0072	0.0088	0.0584	0.0016	0.08	na-MCI	0.09
		sda-MCI	0.16		0.008	0.0144	0.0176	0.1168	0.0032	0.16	sda-MCI	0.11
		Control	0.68		0.034	0.0612	0.0748	0.4964	0.0136	0.68	Control	0.73
		Dementia	0		0	0	0	0	0	0	Dementia	0.02
		TOTAL	1								TOTAL	1
					0.05	0.09	0.11	0.73	0.02	1
								Odds
	Follow-up B	Baseline A	P(B)	P(A)	P(B/A)	P(B/A)*P(A)	P(A/B)	mda-MCI	na-MCI	sda-MCI
	mda-MCI	mda-MCI	0.05	0.08	0.004	0.00032	0.0127796
		na-MCI		0.08	0.004	0.00032	0.0127796	1
		sda-MCI		0.16	0.008	0.00128	0.0511182	4	4
		Control		0.68	0.034	0.02312	0.923323	72.25	72.25	18.0625
		Dementia		0	0	0	0
					Summation	0.02504	1
	Follow-up	Baseline	VALUE
	na-MCI	mda-MCI	0.09	0.08	0.0072	0.000576	0.0127796
		na-MCI		0.08	0.0072	0.000576	0.0127796	1
		sda-MCI		0.16	0.0144	0.002304	0.0553633	4.33218	4.33218
		Control		0.68	0.0612	0.041616	0.923323	72.25	72.25	16.6775
		Dementia		0	0	0	0
					Summation	0.045072	1.00425
	Follow-up	Baseline	VALUE
	sda-MCI	mda-MCI	0.11	0.08	0.0088	0.000704	0.0127796
		na-MCI		0.08	0.0088	0.000704	0.0127796	1
		sda-MCI		0.16	0.0176	0.002816	0.0511182	4	4
		Control		0.68	0.0748	0.050864	0.923323	72.25	72.25	18.0625
		Dementia		0	0	0	0
					Summation	0.055088	1
	Follow-up	Baseline	VALUE
	Control	mda-MCI	0.73	0.08	0.0584	0.004672	0.0127796
		na-MCI		0.08	0.0584	0.004672	0.0127796	1
		sda-MCI		0.16	0.1168	0.018688	0.0511182	4	4
		Control		0.68	0.4964	0.337552	0.923323	72.25	72.25	18.0625
		Dementia		0	0	0	0
					Summation	0.365584	1
	Follow-up	Baseline	VALUE
	Dementia	mda-MCI	0.02	0.08	0.0016	0.000128	0.0127796
		na-MCI		0.08	0.0016	0.000128	0.0127796	1
		sda-MCI		0.16	0.0032	0.000512	0.0511182	4	4
		Control		0.68	0.0136	0.009248	0.923323	72.25	72.25	18.0625
		Dementia		0	0	0	0
					Summation	0.010016	1

## Sheet: Interval 3
		Baseline P(A)									Follow-up P(B)
					mda-MCI	na-MCI	sda-MCI	Control	Dementia
		mda-MCI	0.07		0.0063	0.0056	0.0063	0.0504	0.0014	0.07	mda-MCI	0.09
		na-MCI	0.11		0.0099	0.0088	0.0099	0.0792	0.0022	0.11	na-MCI	0.08
		sda-MCI	0.14		0.0126	0.0112	0.0126	0.1008	0.0028	0.14	sda-MCI	0.09
		Control	0.68		0.0612	0.0544	0.0612	0.4896	0.0136	0.68	Control	0.72
		Dementia	0		0	0	0	0	0	0	Dementia	0.02
		TOTAL	1								TOTAL	1
					0.09	0.08	0.09	0.72	0.02	1
								Odds
	Follow-up B	Baseline A	P(B)	P(A)	P(B/A)	P(B/A)*P(A)	P(A/B)	mda-MCI	na-MCI	sda-MCI
	mda-MCI	mda-MCI	0.09	0.07	0.0063	0.000441	0.00981964
		na-MCI		0.11	0.0099	0.001089	0.0242485	0.404959
		sda-MCI		0.14	0.0126	0.001764	0.0392786	4	1.61983
		Control		0.68	0.0612	0.041616	0.926653	94.3673	38.2149	23.5918
		Dementia		0	0	0	0
					Summation	0.04491	1
	Follow-up	Baseline	VALUE
	na-MCI	mda-MCI	0.08	0.07	0.0056	0.000392	0.00981964
		na-MCI		0.11	0.0088	0.000968	0.0242485	0.404959
		sda-MCI		0.14	0.0112	0.001568	0.0423875	4.31661	1.74805
		Control		0.68	0.0544	0.036992	0.926653	94.3673	38.2149	21.8615
		Dementia		0	0	0	0
					Summation	0.03992	1.00311
	Follow-up	Baseline	VALUE
	sda-MCI	mda-MCI	0.09	0.07	0.0063	0.000441	0.00981964
		na-MCI		0.11	0.0099	0.001089	0.0242485	0.404959
		sda-MCI		0.14	0.0126	0.001764	0.0392786	4	1.61983
		Control		0.68	0.0612	0.041616	0.926653	94.3673	38.2149	23.5918
		Dementia		0	0	0	0
					Summation	0.04491	1
	Follow-up	Baseline	VALUE
	Control	mda-MCI	0.72	0.07	0.0504	0.003528	0.00981964
		na-MCI		0.11	0.0792	0.008712	0.0242485	0.404959
		sda-MCI		0.14	0.1008	0.014112	0.0392786	4	1.61983
		Control		0.68	0.4896	0.332928	0.926653	94.3673	38.2149	23.5918
		Dementia		0	0	0	0
					Summation	0.35928	1
	Follow-up	Baseline	VALUE
	Dementia	mda-MCI	0.02	0.07	0.0014	9.8e-05	0.00981964
		na-MCI		0.11	0.0022	0.000242	0.0242485	0.404959
		sda-MCI		0.14	0.0028	0.000392	0.0392786	4	1.61983
		Control		0.68	0.0136	0.009248	0.926653	94.3673	38.2149	23.5918
		Dementia		0	0	0	0
					Summation	0.00998	1

## Sheet: Interval 4
		Baseline P(A)									Follow-up P(B)
					mda-MCI	na-MCI	sda-MCI	Control	Dementia
		mda-MCI	0.08		0.0048	0.0056	0.0088	0.06	0.0008	0.08	mda-MCI	0.06
		na-MCI	0.07		0.0042	0.0049	0.0077	0.0525	0.0007	0.07	na-MCI	0.07
		sda-MCI	0.16		0.0096	0.0112	0.0176	0.12	0.0016	0.16	sda-MCI	0.11
		Control	0.69		0.0414	0.0483	0.0759	0.5175	0.0069	0.69	Control	0.75
		Dementia	0		0	0	0	0	0	0	Dementia	0.01
		TOTAL	1								TOTAL	1
					0.06	0.07	0.11	0.75	0.01	1
								Odds
	Follow-up B	Baseline A	P(B)	P(A)	P(B/A)	P(B/A)*P(A)	P(A/B)	mda-MCI	na-MCI	sda-MCI
	mda-MCI	mda-MCI	0.06	0.08	0.0048	0.000384	0.0124756
		na-MCI		0.07	0.0042	0.000294	0.00955166	1.30612
		sda-MCI		0.16	0.0096	0.001536	0.0499025	4	5.22449
		Control		0.69	0.0414	0.028566	0.92807	74.3906	97.1633	18.5977
		Dementia		0	0	0	0
					Summation	0.03078	1
	Follow-up	Baseline	VALUE
	na-MCI	mda-MCI	0.07	0.08	0.0056	0.000448	0.0124756
		na-MCI		0.07	0.0049	0.000343	0.00955166	1.30612
		sda-MCI		0.16	0.0112	0.001792	0.0537702	4.31002	5.62941
		Control		0.69	0.0483	0.033327	0.92807	74.3906	97.1633	17.2599
		Dementia		0	0	0	0
					Summation	0.03591	1.00387
	Follow-up	Baseline	VALUE
	sda-MCI	mda-MCI	0.11	0.08	0.0088	0.000704	0.0124756
		na-MCI		0.07	0.0077	0.000539	0.00955166	1.30612
		sda-MCI		0.16	0.0176	0.002816	0.0499025	4	5.22449
		Control		0.69	0.0759	0.052371	0.92807	74.3906	97.1633	18.5977
		Dementia		0	0	0	0
					Summation	0.05643	1
	Follow-up	Baseline	VALUE
	Control	mda-MCI	0.75	0.08	0.06	0.0048	0.0124756
		na-MCI		0.07	0.0525	0.003675	0.00955166	1.30612
		sda-MCI		0.16	0.12	0.0192	0.0499025	4	5.22449
		Control		0.69	0.5175	0.357075	0.92807	74.3906	97.1633	18.5977
		Dementia		0	0	0	0
					Summation	0.38475	1
	Follow-up	Baseline	VALUE
	Dementia	mda-MCI	0.01	0.08	0.0008	6.4e-05	0.0124756
		na-MCI		0.07	0.0007	4.9e-05	0.00955166	1.30612
		sda-MCI		0.16	0.0016	0.000256	0.0499025	4	5.22449
		Control		0.69	0.0069	0.004761	0.92807	74.3906	97.1633	18.5977
		Dementia		0	0	0	0
					Summation	0.00513	1

## Sheet: Interval 5
5
		Baseline P(A)									Follow-up P(B)
					mda-MCI	na-MCI	sda-MCI	Control	Dementia
		mda-MCI	0.07		0.0049	0.0063	0.0084	0.0483	0.0021	0.07	mda-MCI	0.07
		na-MCI	0.11		0.0077	0.0099	0.0132	0.0759	0.0033	0.11	na-MCI	0.09
		sda-MCI	0.17		0.0119	0.0153	0.0204	0.1173	0.0051	0.17	sda-MCI	0.12
		Control	0.65		0.0455	0.0585	0.078	0.4485	0.0195	0.65	Control	0.69
		Dementia	0		0	0	0	0	0	0	Dementia	0.03
		TOTAL	1								TOTAL	1
					0.07	0.09	0.12	0.69	0.03	1
								Odds
	Follow-up B	Baseline A	P(B)	P(A)	P(B/A)	P(B/A)*P(A)	P(A/B)	mda-MCI	na-MCI	sda-MCI
	mda-MCI	mda-MCI	0.07	0.07	0.0049	0.000343	0.0104611
		na-MCI		0.11	0.0077	0.000847	0.0258326	0.404959
		sda-MCI		0.17	0.0119	0.002023	0.0616994	5.89796	2.38843
		Control		0.65	0.0455	0.029575	0.902007	86.2245	34.9174	14.6194
		Dementia		0	0	0	0
					Summation	0.032788	1
	Follow-up	Baseline	VALUE
	na-MCI	mda-MCI	0.09	0.07	0.0063	0.000441	0.0104611
		na-MCI		0.11	0.0099	0.001089	0.0258326	0.404959
		sda-MCI		0.17	0.0153	0.002601	0.0684024	6.53871	2.64791
		Control		0.65	0.0585	0.038025	0.902007	86.2245	34.9174	13.1868
		Dementia		0	0	0	0
					Summation	0.042156	1.0067
	Follow-up	Baseline	VALUE
	sda-MCI	mda-MCI	0.12	0.07	0.0084	0.000588	0.0104611
		na-MCI		0.11	0.0132	0.001452	0.0258326	0.404959
		sda-MCI		0.17	0.0204	0.003468	0.0616994	5.89796	2.38843
		Control		0.65	0.078	0.0507	0.902007	86.2245	34.9174	14.6194
		Dementia		0	0	0	0
					Summation	0.056208	1
	Follow-up	Baseline	VALUE
	Control	mda-MCI	0.69	0.07	0.0483	0.003381	0.0104611
		na-MCI		0.11	0.0759	0.008349	0.0258326	0.404959
		sda-MCI		0.17	0.1173	0.019941	0.0616994	5.89796	2.38843
		Control		0.65	0.4485	0.291525	0.902007	86.2245	34.9174	14.6194
		Dementia		0	0	0	0
					Summation	0.323196	1
	Follow-up	Baseline	VALUE
	Dementia	mda-MCI	0.03	0.07	0.0021	0.000147	0.0104611
		na-MCI		0.11	0.0033	0.000363	0.0258326	0.404959
		sda-MCI		0.17	0.0051	0.000867	0.0616994	5.89796	2.38843
		Control		0.65	0.0195	0.012675	0.902007	86.2245	34.9174	14.6194
		Dementia		0	0	0	0
					Summation	0.014052	1

## Sheet: Interval 6
		Baseline P(A)									Follow-up P(B)
					mda-MCI	na-MCI	sda-MCI	Control	Dementia
		mda-MCI	0.1		0.0125	0.01	0.01	0.0625	0.005	0.1	mda-MCI	0.125
		na-MCI	0.1		0.0125	0.01	0.01	0.0625	0.005	0.1	na-MCI	0.1
		sda-MCI	0.17		0.02125	0.017	0.017	0.10625	0.0085	0.17	sda-MCI	0.1
		Control	0.63		0.07875	0.063	0.063	0.39375	0.0315	0.63	Control	0.625
		Dementia	0		0	0	0	0	0	0	Dementia	0.05
		TOTAL	1								TOTAL	1
					0.125	0.1	0.1	0.625	0.05	1
								Odds
	Follow-up B	Baseline A	P(B)	P(A)	P(B/A)	P(B/A)*P(A)	P(A/B)	mda-MCI	na-MCI	sda-MCI
	mda-MCI	mda-MCI	0.125	0.1	0.0125	0.00125	0.0224316
		na-MCI		0.1	0.0125	0.00125	0.0224316	1
		sda-MCI		0.17	0.02125	0.0036125	0.0648273	2.89	2.89
		Control		0.63	0.07875	0.0496125	0.89031	39.69	39.69	13.7336
		Dementia		0	0	0	0
					Summation	0.055725	1
	Follow-up	Baseline	VALUE
	na-MCI	mda-MCI	0.1	0.1	0.01	0.001	0.0224316
		na-MCI		0.1	0.01	0.001	0.0224316	1
		sda-MCI		0.17	0.017	0.00289	0.0728143	3.24606	3.24606
		Control		0.63	0.063	0.03969	0.89031	39.69	39.69	12.2271
		Dementia		0	0	0	0
					Summation	0.04458	1.00799
	Follow-up	Baseline	VALUE
	sda-MCI	mda-MCI	0.1	0.1	0.01	0.001	0.0224316
		na-MCI		0.1	0.01	0.001	0.0224316	1
		sda-MCI		0.17	0.017	0.00289	0.0648273	2.89	2.89
		Control		0.63	0.063	0.03969	0.89031	39.69	39.69	13.7336
		Dementia		0	0	0	0
					Summation	0.04458	1
	Follow-up	Baseline	VALUE
	Control	mda-MCI	0.625	0.1	0.0625	0.00625	0.0224316
		na-MCI		0.1	0.0625	0.00625	0.0224316	1
		sda-MCI		0.17	0.10625	0.0180625	0.0648273	2.89	2.89
		Control		0.63	0.39375	0.248062	0.89031	39.69	39.69	13.7336
		Dementia		0	0	0	0
					Summation	0.278625	1
	Follow-up	Baseline	VALUE
	Dementia	mda-MCI	0.05	0.1	0.005	0.0005	0.0224316
		na-MCI		0.1	0.005	0.0005	0.0224316	1
		sda-MCI		0.17	0.0085	0.001445	0.0648273	2.89	2.89
		Control		0.63	0.0315	0.019845	0.89031	39.69	39.69	13.7336
		Dementia		0	0	0	0
					Summation	0.02229	1

## Sheet: Interval 7
		Baseline P(A)									Follow-up P(B)
					mda-MCI	na-MCI	sda-MCI	Control	Dementia
		mda-MCI	0.09		0.0036	0.0009	0.0036	0.0756	0.0063	0.09	mda-MCI	0.04
		na-MCI	0.04		0.0016	0.0004	0.0016	0.0336	0.0028	0.04	na-MCI	0.01
		sda-MCI	0.16		0.0064	0.0016	0.0064	0.1344	0.0112	0.16	sda-MCI	0.04
		Control	0.71		0.0284	0.0071	0.0284	0.5964	0.0497	0.71	Control	0.84
		Dementia	0		0	0	0	0	0	0	Dementia	0.07
		TOTAL	1								TOTAL	1
					0.04	0.01	0.04	0.84	0.07	1
								Odds
	Follow-up B	Baseline A	P(B)	P(A)	P(B/A)	P(B/A)*P(A)	P(A/B)	mda-MCI	na-MCI	sda-MCI
	mda-MCI	mda-MCI	0.04	0.09	0.0036	0.000324	0.0150167
		na-MCI		0.04	0.0016	6.4e-05	0.00296626	5.0625
		sda-MCI		0.16	0.0064	0.001024	0.0474601	3.16049	16
		Control		0.71	0.0284	0.020164	0.934557	62.2346	315.062	19.6914
		Dementia		0	0	0	0
					Summation	0.021576	1
	Follow-up	Baseline	VALUE
	na-MCI	mda-MCI	0.01	0.09	0.0009	8.1e-05	0.0150167
		na-MCI		0.04	0.0004	1.6e-05	0.00296626	5.0625
		sda-MCI		0.16	0.0016	0.000256	0.0507836	3.38181	17.1204
		Control		0.71	0.0071	0.005041	0.934557	62.2346	315.062	18.4027
		Dementia		0	0	0	0
					Summation	0.005394	1.00332
	Follow-up	Baseline	VALUE
	sda-MCI	mda-MCI	0.04	0.09	0.0036	0.000324	0.0150167
		na-MCI		0.04	0.0016	6.4e-05	0.00296626	5.0625
		sda-MCI		0.16	0.0064	0.001024	0.0474601	3.16049	16
		Control		0.71	0.0284	0.020164	0.934557	62.2346	315.062	19.6914
		Dementia		0	0	0	0
					Summation	0.021576	1
	Follow-up	Baseline	VALUE
	Control	mda-MCI	0.84	0.09	0.0756	0.006804	0.0150167
		na-MCI		0.04	0.0336	0.001344	0.00296626	5.0625
		sda-MCI		0.16	0.1344	0.021504	0.0474601	3.16049	16
		Control		0.71	0.5964	0.423444	0.934557	62.2346	315.062	19.6914
		Dementia		0	0	0	0
					Summation	0.453096	1
	Follow-up	Baseline	VALUE
	Dementia	mda-MCI	0.07	0.09	0.0063	0.000567	0.0150167
		na-MCI		0.04	0.0028	0.000112	0.00296626	5.0625
		sda-MCI		0.16	0.0112	0.001792	0.0474601	3.16049	16
		Control		0.71	0.0497	0.035287	0.934557	62.2346	315.062	19.6914
		Dementia		0	0	0	0
					Summation	0.037758	1

## Sheet: Interval 8
		Baseline P(A)									Follow-up P(B)
					mda-MCI	na-MCI	sda-MCI	Control	Dementia
		mda-MCI	0.07		0.0035	0.0028	0.0035	0.0581	0.0021	0.07	mda-MCI	0.05
		na-MCI	0.05		0.0025	0.002	0.0025	0.0415	0.0015	0.05	na-MCI	0.04
		sda-MCI	0.17		0.0085	0.0068	0.0085	0.1411	0.0051	0.17	sda-MCI	0.05
		Control	0.71		0.0355	0.0284	0.0355	0.5893	0.0213	0.71	Control	0.83
		Dementia	0		0	0	0	0	0	0	Dementia	0.03
		TOTAL	1								TOTAL	1
					0.05	0.04	0.05	0.83	0.03	1
								Odds
	Follow-up B	Baseline A	P(B)	P(A)	P(B/A)	P(B/A)*P(A)	P(A/B)	mda-MCI	na-MCI	sda-MCI
	mda-MCI	mda-MCI	0.05	0.07	0.0035	0.000245	0.00906736
		na-MCI		0.05	0.0025	0.000125	0.0046262	1.96
		sda-MCI		0.17	0.0085	0.001445	0.0534789	5.89796	11.56
		Control		0.71	0.0355	0.025205	0.932828	102.878	201.64	17.4429
		Dementia		0	0	0	0
					Summation	0.02702	1
	Follow-up	Baseline	VALUE
	na-MCI	mda-MCI	0.04	0.07	0.0028	0.000196	0.00906736
		na-MCI		0.05	0.002	0.0001	0.0046262	1.96
		sda-MCI		0.17	0.0068	0.001156	0.0573299	6.32267	12.3924
		Control		0.71	0.0284	0.020164	0.932828	102.878	201.64	16.2712
		Dementia		0	0	0	0
					Summation	0.021616	1.00385
	Follow-up	Baseline	VALUE
	sda-MCI	mda-MCI	0.05	0.07	0.0035	0.000245	0.00906736
		na-MCI		0.05	0.0025	0.000125	0.0046262	1.96
		sda-MCI		0.17	0.0085	0.001445	0.0534789	5.89796	11.56
		Control		0.71	0.0355	0.025205	0.932828	102.878	201.64	17.4429
		Dementia		0	0	0	0
					Summation	0.02702	1
	Follow-up	Baseline	VALUE
	Control	mda-MCI	0.83	0.07	0.0581	0.004067	0.00906736
		na-MCI		0.05	0.0415	0.002075	0.0046262	1.96
		sda-MCI		0.17	0.1411	0.023987	0.0534789	5.89796	11.56
		Control		0.71	0.5893	0.418403	0.932828	102.878	201.64	17.4429
		Dementia		0	0	0	0
					Summation	0.448532	1
	Follow-up	Baseline	VALUE
	Dementia	mda-MCI	0.03	0.07	0.0021	0.000147	0.00906736
		na-MCI		0.05	0.0015	7.5e-05	0.0046262	1.96
		sda-MCI		0.17	0.0051	0.000867	0.0534789	5.89796	11.56
		Control		0.71	0.0213	0.015123	0.932828	102.878	201.64	17.4429
		Dementia		0	0	0	0
					Summation	0.016212	1

## Sheet: Interval 9
		Baseline P(A)									Follow-up P(B)
					mda-MCI	na-MCI	sda-MCI	Control	Dementia
		mda-MCI	0.07		0.0042	0.0056	0.0035	0.0539	0.0028	0.07	mda-MCI	0.06
		na-MCI	0.1		0.006	0.008	0.005	0.077	0.004	0.1	na-MCI	0.08
		sda-MCI	0.15		0.009	0.012	0.0075	0.1155	0.006	0.15	sda-MCI	0.05
		Control	0.68		0.0408	0.0544	0.034	0.5236	0.0272	0.68	Control	0.77
		Dementia	0		0	0	0	0	0	0	Dementia	0.04
		TOTAL	1								TOTAL	1
					0.06	0.08	0.05	0.77	0.04	1
								Odds
	Follow-up B	Baseline A	P(B)	P(A)	P(B/A)	P(B/A)*P(A)	P(A/B)	mda-MCI	na-MCI	sda-MCI
	mda-MCI	mda-MCI	0.06	0.07	0.0042	0.000294	0.00980392
		na-MCI		0.1	0.006	0.0006	0.020008	0.49
		sda-MCI		0.15	0.009	0.00135	0.045018	4.59184	2.25
		Control		0.68	0.0408	0.027744	0.92517	94.3673	46.24	20.5511
		Dementia		0	0	0	0
					Summation	0.029988	1
	Follow-up	Baseline	VALUE
	na-MCI	mda-MCI	0.08	0.07	0.0056	0.000392	0.00980392
		na-MCI		0.1	0.008	0.0008	0.020008	0.49
		sda-MCI		0.15	0.012	0.0018	0.0486592	4.96324	2.43199
		Control		0.68	0.0544	0.036992	0.92517	94.3673	46.24	19.0133
		Dementia		0	0	0	0
					Summation	0.039984	1.00364
	Follow-up	Baseline	VALUE
	sda-MCI	mda-MCI	0.05	0.07	0.0035	0.000245	0.00980392
		na-MCI		0.1	0.005	0.0005	0.020008	0.49
		sda-MCI		0.15	0.0075	0.001125	0.045018	4.59184	2.25
		Control		0.68	0.034	0.02312	0.92517	94.3673	46.24	20.5511
		Dementia		0	0	0	0
					Summation	0.02499	1
	Follow-up	Baseline	VALUE
	Control	mda-MCI	0.77	0.07	0.0539	0.003773	0.00980392
		na-MCI		0.1	0.077	0.0077	0.020008	0.49
		sda-MCI		0.15	0.1155	0.017325	0.045018	4.59184	2.25
		Control		0.68	0.5236	0.356048	0.92517	94.3673	46.24	20.5511
		Dementia		0	0	0	0
					Summation	0.384846	1
	Follow-up	Baseline	VALUE
	Dementia	mda-MCI	0.04	0.07	0.0028	0.000196	0.00980392
		na-MCI		0.1	0.004	0.0004	0.020008	0.49
		sda-MCI		0.15	0.006	0.0009	0.045018	4.59184	2.25
		Control		0.68	0.0272	0.018496	0.92517	94.3673	46.24	20.5511
		Dementia		0	0	0	0
					Summation	0.019992	1

## Sheet: Interval 10
		Baseline P(A)									Follow-up P(B)
					mda-MCI	na-MCI	sda-MCI	Control	Dementia
		mda-MCI	0.09		0.0063	0.009	0.009	0.0603	0.0054	0.09	mda-MCI	0.07
		na-MCI	0.13		0.0091	0.013	0.013	0.0871	0.0078	0.13	na-MCI	0.1
		sda-MCI	0.16		0.0112	0.016	0.016	0.1072	0.0096	0.16	sda-MCI	0.1
		Control	0.62		0.0434	0.062	0.062	0.4154	0.0372	0.62	Control	0.67
		Dementia	0		0	0	0	0	0	0	Dementia	0.06
		TOTAL	1								TOTAL	1
					0.07	0.1	0.1	0.67	0.06	1
								Odds
	Follow-up B	Baseline A	P(B)	P(A)	P(B/A)	P(B/A)*P(A)	P(A/B)	mda-MCI	na-MCI	sda-MCI
	mda-MCI	mda-MCI	0.07	0.09	0.0063	0.000567	0.0186207
		na-MCI		0.13	0.0091	0.001183	0.0388506	0.47929
		sda-MCI		0.16	0.0112	0.001792	0.0588506	3.16049	1.51479
		Control		0.62	0.0434	0.026908	0.883678	47.4568	22.7456	15.0156
		Dementia		0	0	0	0
					Summation	0.03045	1
	Follow-up	Baseline	VALUE
	na-MCI	mda-MCI	0.1	0.09	0.009	0.00081	0.0186207
		na-MCI		0.13	0.013	0.00169	0.0388506	0.47929
		sda-MCI		0.16	0.016	0.00256	0.0665973	3.57652	1.71419
		Control		0.62	0.062	0.03844	0.883678	47.4568	22.7456	13.269
		Dementia		0	0	0	0
					Summation	0.0435	1.00775
	Follow-up	Baseline	VALUE
	sda-MCI	mda-MCI	0.1	0.09	0.009	0.00081	0.0186207
		na-MCI		0.13	0.013	0.00169	0.0388506	0.47929
		sda-MCI		0.16	0.016	0.00256	0.0588506	3.16049	1.51479
		Control		0.62	0.062	0.03844	0.883678	47.4568	22.7456	15.0156
		Dementia		0	0	0	0
					Summation	0.0435	1
	Follow-up	Baseline	VALUE
	Control	mda-MCI	0.67	0.09	0.0603	0.005427	0.0186207
		na-MCI		0.13	0.0871	0.011323	0.0388506	0.47929
		sda-MCI		0.16	0.1072	0.017152	0.0588506	3.16049	1.51479
		Control		0.62	0.4154	0.257548	0.883678	47.4568	22.7456	15.0156
		Dementia		0	0	0	0
					Summation	0.29145	1
	Follow-up	Baseline	VALUE
	Dementia	mda-MCI	0.06	0.09	0.0054	0.000486	0.0186207
		na-MCI		0.13	0.0078	0.001014	0.0388506	0.47929
		sda-MCI		0.16	0.0096	0.001536	0.0588506	3.16049	1.51479
		Control		0.62	0.0372	0.023064	0.883678	47.4568	22.7456	15.0156
		Dementia		0	0	0	0
					Summation	0.0261	1

[truncated: 3 more sheets: Interval 11, Interval 12, Interval 13]
